# Supplementary material
Source: MDPI journal article supplement (https://www.mdpi.com/2072-4292/14/7/1557)
Supplement: s1 [file s1]

Supplementary Materials

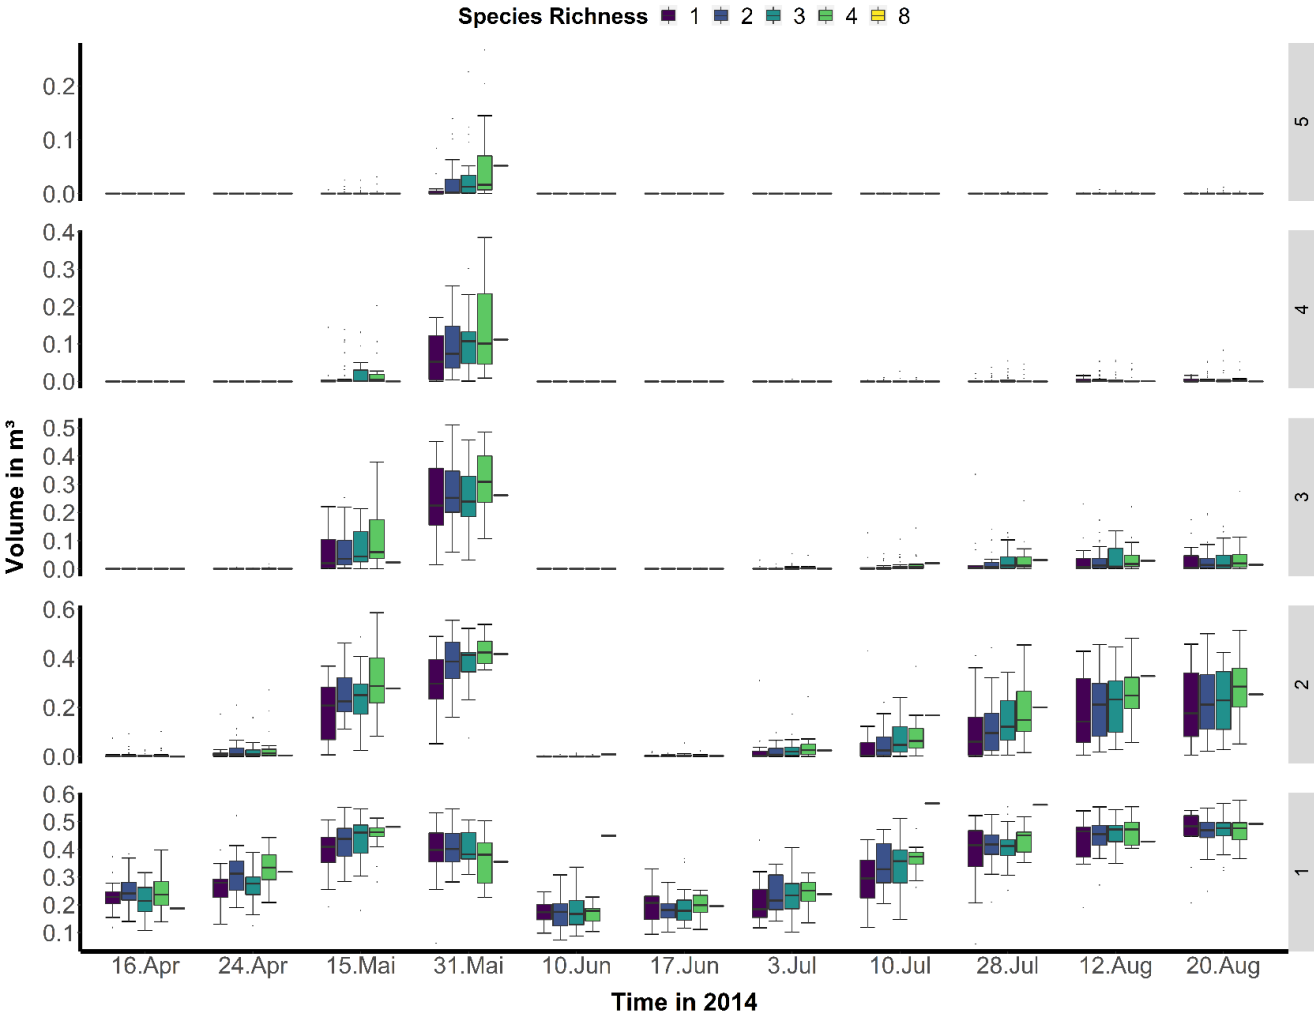

**Figure S1.** Temporal distribution of point cloud volume occupying five different strata of height varying from (1 - 0.3-20 cm, 2- 20-40 cm, 3- 40-60 cm, 4 - 60-80cm, and 5- 80-100 cm). The volume distribution vary across species richness gradient along with strata of height.

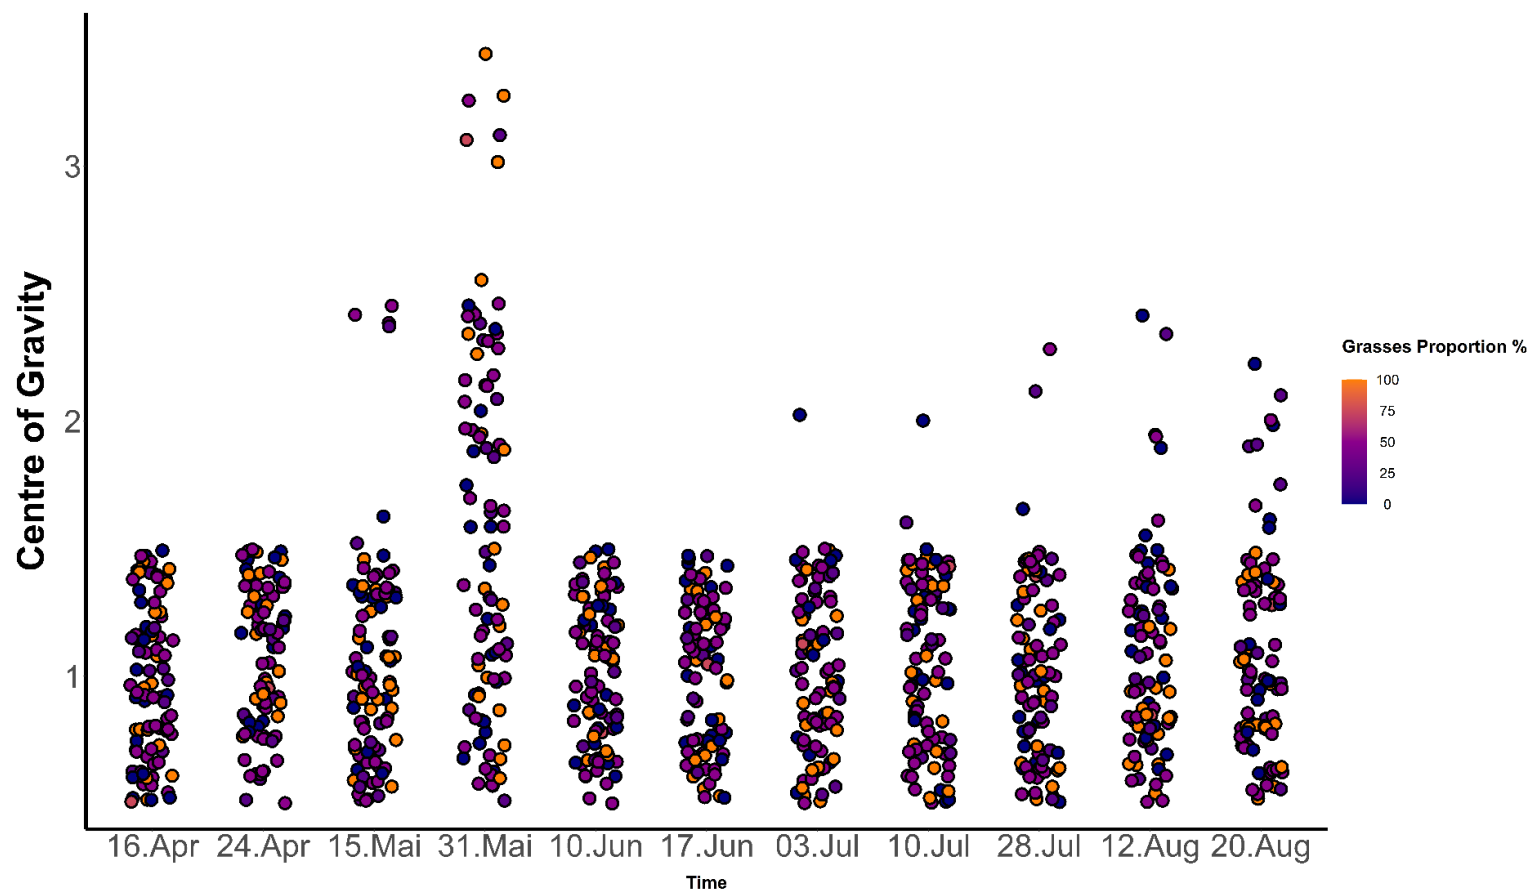

**Figure S2.** Correlation between the centre of gravity and proportion of grasses dominated communities throughout the growing season. The centre of gravity represents the height stratum with the highest density of points. The location was measured in terms of the height-weighted average volume allocation of the community. The five different strata of height considered in the calculation of the centre of gravity relates to figure x-axis as (1) 0.3–20 cm, (2) 20–40 cm, (3) 40–60 cm, (4) 60–80 cm and (5) 80–100 cm. A gradient of colours indicates the grass's proportions.
